# Supplementary material for: Long-Term Impact of Severe Postoperative Complications after Esophagectomy for Cancer: Individual Patient Data Meta-Analysis
Source: MDPI journal article supplement (doi:10.3390/cancers16081468), 2024-04-11
Supplement: s1 [file s1]

| <b>Study</b>                 | <b>Confounding Bias</b> | <b>Selection Bias</b> | <b>Classification Bias</b> | <b>Intervention Bias</b> | <b>Missing Data Bias</b> | <b>Measurement Bias</b> | <b>Reporting Bias</b> | <b>Bias</b> |
|------------------------------|-------------------------|-----------------------|----------------------------|--------------------------|--------------------------|-------------------------|-----------------------|-------------|
| D'Annoville et al, 2012 [17] | Serious                 | Serious               | Moderate                   | Moderate                 | Serious                  | Moderate                | Serious               | Serious     |
| Xia et al, 2013 [20]         | Moderate                | Moderate              | Serious                    | Moderate                 | Serious                  | Moderate                | Serious               | Serious     |
| Luc et al, 2015 [22]         | Moderate                | Serious               | Moderate                   | Serious                  | Moderate                 | Moderate                | Moderate              | Serious     |
| Yamashita et al, 2016 [26]   | Moderate                | Serious               | Moderate                   | Serious                  | Serious                  | Moderate                | Moderate              | Serious     |
| Aahlin et al, 2016 [25]      | Serious                 | Moderate              | Moderate                   | Moderate                 | Serious                  | Serious                 | Serious               | Serious     |
| Li et al, 2016 [19]          | Moderate                | Serious               | Moderate                   | Moderate                 | Serious                  | Moderate                | Moderate              | Serious     |
| Kiyozumi et al, 2018 [24]    | Serious                 | Serious               | Moderate                   | Serious                  | Moderate                 | Moderate                | Moderate              | Serious     |
| Bundred et al, 2020 [16]     | Moderate                | Moderate              | Moderate                   | Moderate                 | Serious                  | Moderate                | Moderate              | Serious     |
| Yamamoto et al, 2020 [21]    | Serious                 | Serious               | Serious                    | Moderate                 | Serious                  | Moderate                | Moderate              | Serious     |
| Kurokawa et al, 2020 [23]    | Serious                 | Serious               | Serious                    | Serious                  | Moderate                 | Moderate                | Moderate              | Serious     |

**Supplementary Table S1.** Quality assessment of the included studies (ROBINS-I tool). Each domain is evaluated with one of the following: Low, Moderate, Serious, and Critical. The categories of judgement for each study are low, moderate, serious, and critical risk of bias.
