# Supplementary material for: Long-Term Impact of Severe Postoperative Complications after Esophagectomy for Cancer: Individual Patient Data Meta-Analysis
Source: MDPI journal article supplement (doi:10.3390/cancers16081468), 2024-04-11
Supplement: s1 [file s1]

Author(s):  
Question: SPC compared to no SPC for [Problema di salute e/o di popolazione]  
Setting: Esophagectomy  
Bibliography:

| Certainty assessment      |                       |              |               |              |              |                                                                                                                                      | N <sub>2</sub> of patients |        | Effect            |                                                       | Certainty                                                                                       | Importance |
|---------------------------|-----------------------|--------------|---------------|--------------|--------------|--------------------------------------------------------------------------------------------------------------------------------------|----------------------------|--------|-------------------|-------------------------------------------------------|-------------------------------------------------------------------------------------------------|------------|
| N <sub>2</sub> of studies | Study design          | Risk of bias | Inconsistency | Indirectness | Imprecision  | Other considerations                                                                                                                 | SPC                        | no SPC | Relative (95% CI) | Absolute (95% CI)                                     |                                                                                                 |            |
| Overall Survival          |                       |              |               |              |              |                                                                                                                                      |                            |        |                   |                                                       |                                                                                                 |            |
| 6                         | observational studies | serious      | serious       | not serious  | serious      | publication bias strongly suspected<br>strong association<br>all plausible residual confounding would reduce the demonstrated effect |                            |        | -                 | median <b>8.6 lower</b><br>(12.5 lower to 4.7 lower)  | <br>Low      |            |
| Cancer Specific Survival  |                       |              |               |              |              |                                                                                                                                      |                            |        |                   |                                                       |                                                                                                 |            |
| 3                         | observational studies | serious      | not serious   | serious      | very serious | publication bias strongly suspected<br>strong association<br>all plausible residual confounding would reduce the demonstrated effect |                            |        | -                 | median <b>6.8 lower</b><br>(11.9 lower to 1.7 lower)  | <br>Very low |            |
| Disease-Free Survival     |                       |              |               |              |              |                                                                                                                                      |                            |        |                   |                                                       |                                                                                                 |            |
| 6                         | observational studies | serious      | serious       | not serious  | very serious | publication bias strongly suspected<br>strong association<br>all plausible residual confounding would reduce the demonstrated effect |                            |        | -                 | median <b>4.6 lower</b><br>(11.1 lower to 1.9 higher) | <br>Very low |            |

CI: confidence interval
