# Supplementary material for: Long-Term Impact of Severe Postoperative Complications after Esophagectomy for Cancer: Individual Patient Data Meta-Analysis
Source: Cancers (Basel). 2024 Apr 11;16(8):1468. doi: 10.3390/cancers16081468 (PMC11048031; doi:10.3390/cancers16081468)
Supplement: Supplementary file 1 [file cancers-16-01468-s001.zip]

Archive with 5 entries (5 files):
- Figure S1.tiff
- Figure S2.tiff
- File S1. PRISMA_2020_checklist SPC.pdf
- Table S1.pdf
- Table S2.pdf
